# Supplementary material for: Cytosolic phospholipase A2-α expression in breast cancer is associated with EGFR expression and correlates with an adverse prognosis in luminal tumours
Source: PubMed Central journal article supplement (PMC3031888; doi:10.1038/sj.bjc.6606025), 2010-11-30
Supplement: 6606025x1.pdf [file 6606025x1.pdf]

---

---

**Table S1:** Clinical characteristics of the Irish patients cohort

---

| <b>Variable</b> | <b>no. of patients</b> | <b>%</b> |
|-----------------|------------------------|----------|
| Total patients  | 18                     | 100      |
| Age mean        | 55 (years)             |          |
| range           | 33-77 (years)          |          |
| ER status       |                        |          |
| positive        | 15                     | 83       |
| negative        | 3                      | 17       |
| PR status       |                        |          |
| positive        | 7                      | 39       |
| negative        | 11                     | 61       |
| HER2 status     |                        |          |
| positive        | 4                      | 22       |
| negative        | 14                     | 78       |
| Tumor type      |                        |          |
| IDC             | 15                     | 83       |
| ILC             | 2                      | 11       |
| DCIS            | 1                      | 6        |
| Tumor grade     |                        |          |
| 1               | 1                      | 6        |
| 2               | 8                      | 44       |
| 3               | 9                      | 50       |

---

ER (Estrogen Receptor), PR (Progesteron Receptor),  
IDC (Invasive Ductal Carcinoma), ILC (Invasive Lobular  
Carcinoma), DCIS (Ductal Carcinoma In Situ)

---

---
