# Supplementary material for: Cytosolic phospholipase A2-α expression in breast cancer is associated with EGFR expression and correlates with an adverse prognosis in luminal tumours
Source: PubMed Central journal article supplement (PMC3031888; doi:10.1038/sj.bjc.6606025), 2010-11-30
Supplement: 6606025x2.pdf [file 6606025x2.pdf]

**Table S2:** Association between clinical characteristics and expression levels of cPLA<sub>2</sub>

| Characteristic                      | mean log <sub>10</sub> cPLA <sub>2</sub> expression (±SEM) | P value           |
|-------------------------------------|------------------------------------------------------------|-------------------|
| Estrogen Receptor status            |                                                            | <b>&lt;0.0001</b> |
| negative (n=69)                     | 0.0900 (± 0.03110)                                         |                   |
| positive (n=226)                    | -0.08303 (± 0.01011)                                       |                   |
| Phenotype                           |                                                            | <b>&lt;0.0001</b> |
| luminal (n=200)                     | -0.08518 (± 0.01098)                                       |                   |
| basal (n=95)                        | 0.04718 (± 0.02456)                                        |                   |
| Size of primary tumor (T staging)   |                                                            | <b>&lt;0.05</b>   |
| <2 cm. (n=155)                      | -0.06735 (± 0.01533)                                       |                   |
| >2 cm. (n=140)                      | -0.01511 (± 0.01682)                                       |                   |
| Lymph nodes involvement (N staging) |                                                            | 0,199             |
| no (n=151)                          | -0.02821 (± 0.01849)                                       |                   |
| yes (n=144)                         | -0.05760 (± 0.01306)                                       |                   |
| Metastases (M staging)              |                                                            | 0,9373            |
| no (n=194)                          | -0.04321 (± 0.01473)                                       |                   |
| yes (n=101)                         | -0.04131 (± 0.01777)                                       |                   |
| Tumor grade                         |                                                            | <b>&lt;0.05</b>   |
| 1 (n=75)                            | -0.07121 (± 0.01860)                                       |                   |
| 2 (n=101)                           | -0.06618 (± 0.01254)                                       |                   |
| 3 (n=119)                           | -0.004445 (± 0.02314)                                      |                   |
| 70 genes prognosis signature        |                                                            | 0,0528            |
| good prognosis (n=115)              | -0.07021 (± 0.01406)                                       |                   |
| poor prognosis (n=180)              | -0.02489 (± 0.01632)                                       |                   |
| Wound response model                |                                                            | <b>&lt;0.0001</b> |
| activated (n=126)                   | 0.003730 (± 0.02042)                                       |                   |
| quiescent (n=169)                   | -0.07707 (± 0.01227)                                       |                   |

P values were calculated with Student's t test.  
Significant values are highlighted in bold.
