# Supplementary material for: Cytosolic phospholipase A2-α expression in breast cancer is associated with EGFR expression and correlates with an adverse prognosis in luminal tumours
Source: PubMed Central journal article supplement (PMC3031888; doi:10.1038/sj.bjc.6606025), 2010-11-30
Supplement: 6606025x3.pdf [file 6606025x3.pdf]

**Table S3:** Multivariable proportional-hazard (Cox) analysis of the risk of death or the risk of developing a metastasis as a first event

| Variable                                    | Overall Survival       |                   | Relapse-Free Survival  |                   |
|---------------------------------------------|------------------------|-------------------|------------------------|-------------------|
|                                             | Hazard Ratio (95% CI*) | P value           | Hazard Ratio (95% CI*) | P value           |
| High cPLA <sub>2</sub> (vs. low)            | 2.4 (0.8-7.0)          | 0,11              | 1.1 (0.4-3.2)          | 0,8               |
| Tumor size <2cm (vs. >2cm)                  | 0.48 (0.3-0.77)        | <b>&lt;0.01</b>   | 0.4 (0.26-0.64)        | <b>&lt;0.0001</b> |
| Tumor grade                                 |                        |                   |                        |                   |
| grade 2 (vs. grade 1)                       | 4.6 (1.6-13.3)         | <b>&lt;0.01</b>   | 2.7 (1.3-5.7)          | <b>&lt;0.01</b>   |
| grade 3 (vs. grade 1)                       | 10 (3.6-27.7)          | <b>&lt;0.0001</b> | 4.6 (2.3-9.4)          | <b>&lt;0.0001</b> |
| Tumor diameter (mm.)                        | 1.04 (1.01-1.06)       | <b>&lt;0.01</b>   | 1.05 (1.02-1.07)       | <b>&lt;0.0001</b> |
| ER positive (vs. ER negative)               | 0.3 (0.18-0.48)        | <b>&lt;0.0001</b> | 0.46 (0.28-0.74)       | <b>&lt;0.01</b>   |
| Lymph node involvement (vs. no involvement) | 1.07 (0.98-1.17)       | 0,1               | 1.09 (1.0-1.18)        | 0,036             |
| Age (years)                                 | 0.95 (0.91-0.98)       | <b>&lt;0.01</b>   | 0.94 (0.91-0.98)       | <b>&lt;0.01</b>   |
| No chemotherapy (vs. chemotherapy)          | 1.28 (0.8-2)           | 0,3               | 1.46 (0.93-1.93)       | 0,1               |
| No hormonal therapy (vs. hormonal therapy)  | 1.62 (0.7-3.7)         | 0,25              | 1.79 (0.82-3.88)       | 0,14              |

\* Confidence Interval  
Analysed as a continuous variable
